# Supplementary material for: Oral RNA Interference Therapy for Celiac Disease using a Polymeric Microsphere Formulation
Source: Research Square preprint supplement (doi:10.21203/rs.3.rs-311580/v1), 2021-03-10
Supplement: Supplementary file 1 [file 4931d8a6e0ffc7a66322639d.docx]

**SUPPLEMENTARY DATA**

**Supplementary Figure 1**

**
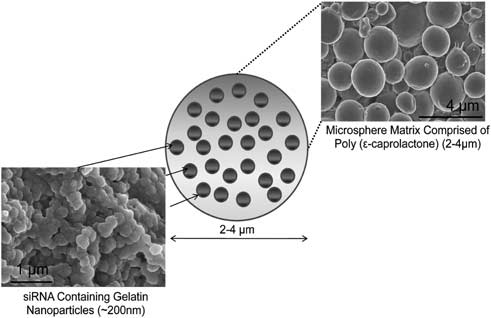
**

| Formulation | Z-Average Particle Diameter (µm)* | siRNA Encapsulation Efficiency (%)* |
| --- | --- | --- |
| Blank NiMOS | 2.66 ± 0.38* | NA |
| siRNA containing NiMOS | 2,63 ± 0.17 | 55.4 ± 8.13 |

*Mean ± S.D. (n = 4)

**Supplementary Figure 1:** Scanning electron micrographs of type B gelatin nanoparticles and Nanoparticles-in-Microsphere Oral System (NiMOS). Particle size and siRNA encapsulation efficiency in NiMOS are presented in the above table.

**Supplementary Figure 2**

| **A**  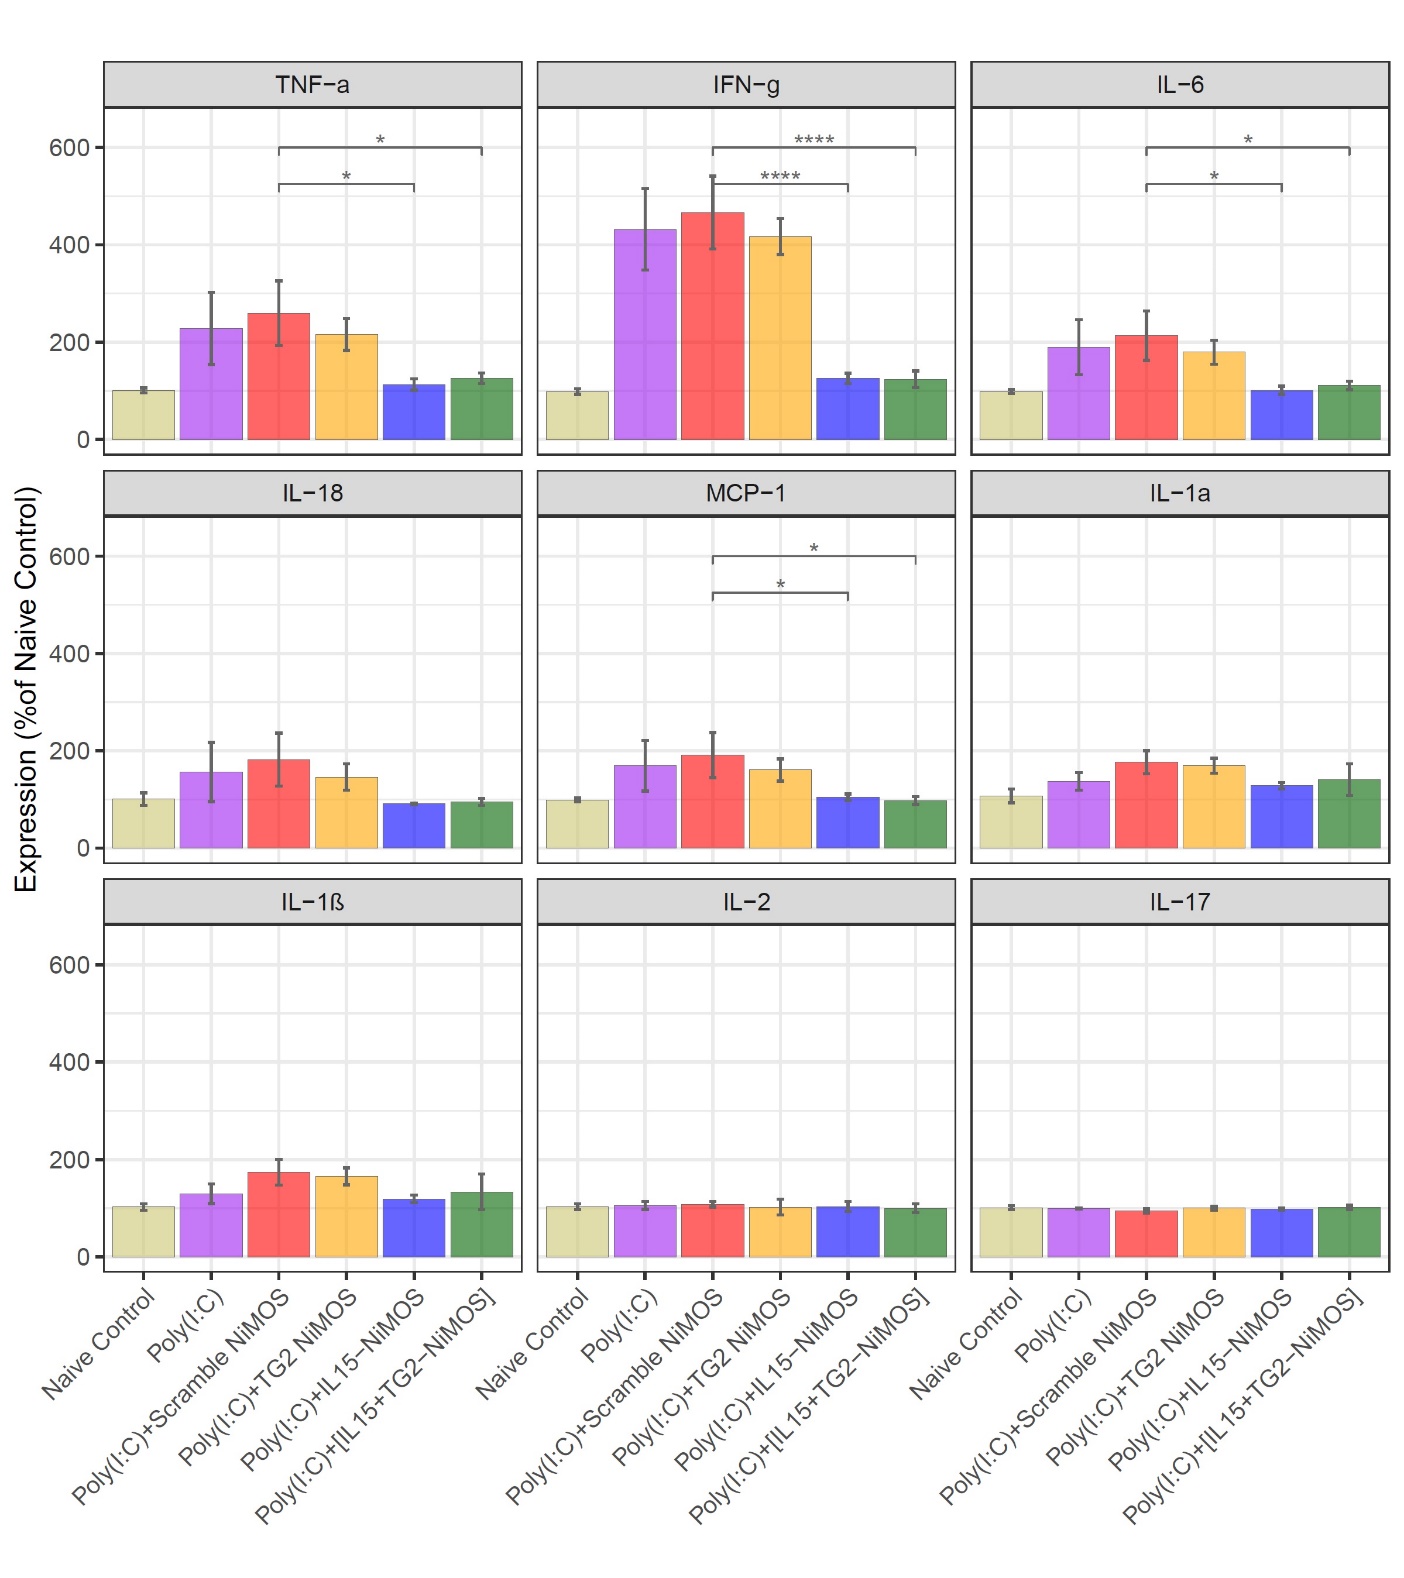 |
| --- |
| **B**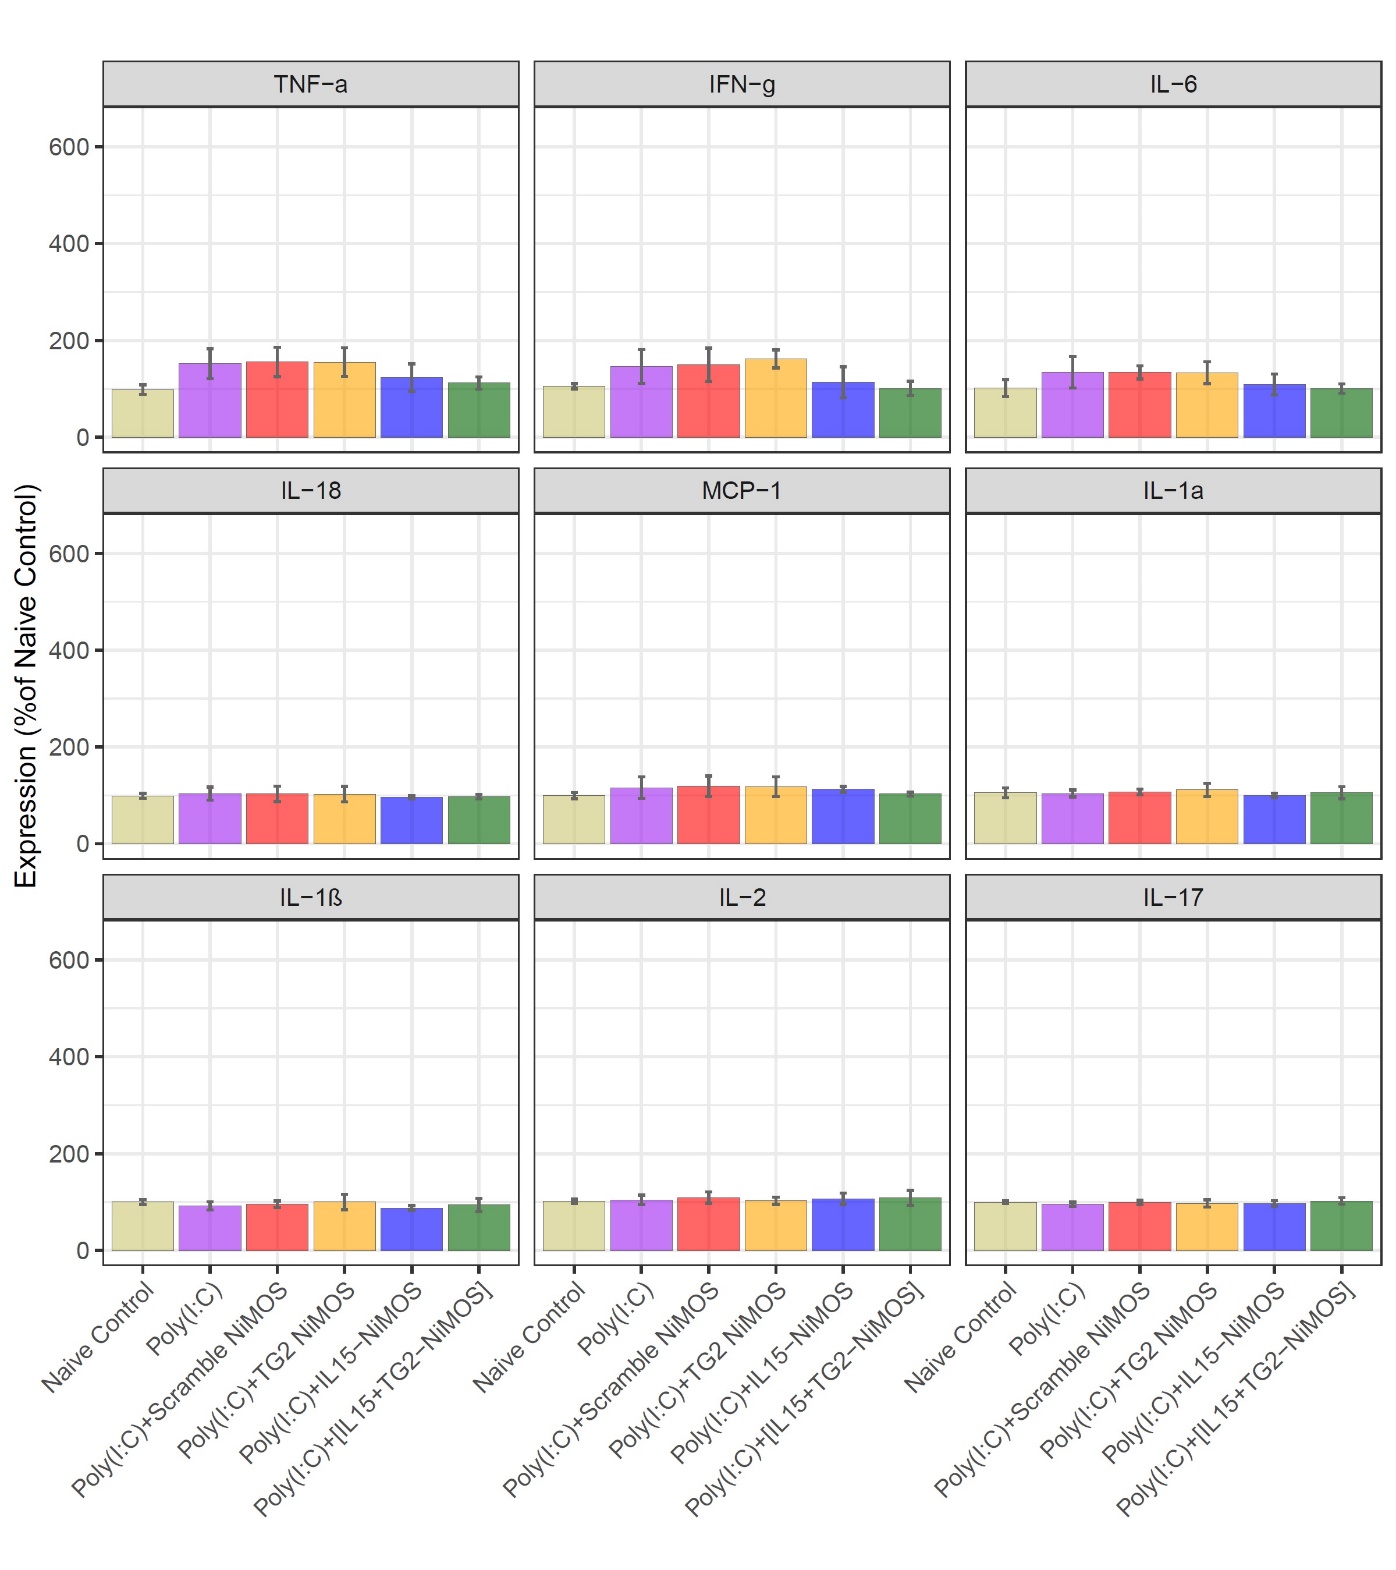 |

Supplementary Figure 2: Relative cytokine expression cytokines the small intestines at (A) 24-hours and (B) 72-hours post last dose; ***p<0.001, **p<0.01,*p<0.05; n=3
